# Supplementary material for: A Systematic Review of Financial Debt in Adolescents and Young Adults: Prevalence, Correlates and Associations with Crime
Source: PubMed Central journal article supplement (PMC4138212; doi:10.1371/journal.pone.0104909), 2014-08-19
Supplement: pone.0104909.s002.pdf [file pone.0104909.s002.pdf]

Table S1

*Proportions of debt*

| Study ID | Author (- study)                    | Year | <i>N</i> | Age group | Sample Type | Continent | % Females | % Ethnic minority | Year data collection | # Items | Type of debt | <i>ESp</i> |
|----------|-------------------------------------|------|----------|-----------|-------------|-----------|-----------|-------------------|----------------------|---------|--------------|------------|
| 1        | Blom, Weijters, and Van der Laan    | 2011 | 2,116    | 1         | 1           | 2         | 38.8      | 22.2              | 2010                 | 4       | 3            | .074       |
| 3        | Davies and Lea                      | 1995 | 140      | 2         | 2           | 2         | 50.0      | 9999              | 1992                 | 4       | 1            | .430       |
| 42       | Dwyer, McCloud, and Hodson - NLSY79 | 2011 | 3,079    | 2         | 1           | 1         | 48.6      | 29.2              | 2004                 | 1       | 2            | .332       |
| 42       | Dwyer, McCloud, and Hodson - NLSY79 | 2011 | 3,079    | 2         | 1           | 1         | 48.6      | 29.2              | 2004                 | 1       | 12           | .191       |
| 42       | Henegar et al. - NLSY79             | 2013 | 2,618    | 2         | 1           | 1         | 51.0      | 9999              | 2008                 | 1       | 2            | .270       |
| 36       | Hogan, Bryant, and Overmyer-Day     | 2013 | 338      | 2         | 2           | 1         | 58.0      | 14.0              | 2003                 | 1       | 3            | .230       |
| 42       | Houle - NLSY97                      | 2013 | 4,789    | 2         | 1           | 1         | 53.0      | 25.0              | 2007                 | 1       | 12           | .390       |
| 6        | Jessop, Herberts, and Solomon       | 2005 | 187      | 2         | 2           | 2         | 69.5      | 9999              | 2003                 | 1       | 1            | .561       |
| 7        | Johnes                              | 1994 | 1,210    | 2         | 2           | 2         | 9999      | 9999              | 1992                 | 1       | 12           | .386       |
| 8        | Joireman, Kees, and Sprott          | 2010 | 209      | 2         | 2           | 1         | 55.0      | 9999              | 2008                 | 1       | 2            | .354       |
| 9        | Jones                               | 2005 | 216      | 2         | 2           | 1         | 92.1      | 12.5              | 2002                 | 2       | 1            | .509       |
| 10       | Lyons                               | 2004 | 835      | 2         | 2           | 1         | 55.0      | 30.1              | 2001                 | 5       | 3            | .370       |
| 13       | Nelissen, Van de Ven, and Stapel    | 2011 | 934      | 1         | 2           | 2         | 54.5      | 9999              | 2009                 | 5       | 1            | .246       |

|    |                              |      |        |   |   |   |      |      |      |      |    |      |
|----|------------------------------|------|--------|---|---|---|------|------|------|------|----|------|
| 14 | Noorda                       | 2008 | 73     | 3 | 3 | 2 | 26.0 | 92.3 | 2008 | 9999 | 1  | .810 |
| 16 | Norvilitis and MacLean       | 2010 | 173    | 2 | 2 | 1 | 77.5 | 26.6 | 2008 | 1    | 2  | .665 |
| 18 | Oosterbeek and Van den Broek | 2009 | 5,621  | 2 | 2 | 2 | 71.2 | 9999 | 2007 | 1    | 1  | .351 |
| 20 | Robb and Sharpe              | 2009 | 3,884  | 2 | 2 | 1 | 65.8 | 13.7 | 2007 | 2    | 2  | .250 |
| 21 | Ross, Cleland, and MacLeod   | 2006 | 334    | 2 | 2 | 2 | 59.0 | 9999 | 2004 | 1    | 2  | .224 |
| 21 | Ross, Cleland, and MacLeod   | 2006 | 334    | 2 | 2 | 2 | 59.0 | 9999 | 2004 | 1    | 12 | .790 |
| 21 | Ross, Cleland, and MacLeod   | 2006 | 334    | 2 | 2 | 2 | 59.0 | 9999 | 2004 | 1    | 13 | .156 |
| 21 | Ross, Cleland, and MacLeod   | 2006 | 334    | 2 | 2 | 2 | 59.0 | 9999 | 2004 | 1    | 14 | .536 |
| 22 | Schwartz and Finnie          | 2002 | 80     | 2 | 2 | 1 | 53.0 | 9999 | 1990 | 1    | 3  | .227 |
| 22 | Schwartz and Finnie          | 2002 | 80     | 2 | 2 | 1 | 53.0 | 9999 | 1990 | 1    | 12 | .459 |
| 23 | Siennick - Add Health        | 2009 | 14,322 | 2 | 1 | 1 | 49.2 | 34.6 | 2003 | 1    | 2  | .387 |
| 23 | Siennick - Add Health        | 2009 | 14,322 | 2 | 1 | 1 | 49.2 | 34.6 | 2003 | 7    | 3  | .320 |
| 23 | Siennick - Add Health        | 2009 | 14,322 | 2 | 1 | 1 | 49.2 | 34.6 | 2003 | 1    | 12 | .290 |
| 42 | Siennick - NLSY79            | 2009 | 6,581  | 2 | 1 | 1 | 48.8 | 36.7 | 2002 | 1    | 1  | .530 |
| 42 | Siennick - NLSY79            | 2009 | 6,581  | 2 | 1 | 1 | 48.8 | 36.7 | 2002 | 1    | 11 | .290 |
| 42 | Siennick - NLSY79            | 2009 | 6,581  | 2 | 1 | 1 | 48.8 | 36.7 | 2002 | 1    | 12 | .155 |
| 42 | Siennick - NLSY79            | 2009 | 6,581  | 2 | 1 | 1 | 48.8 | 36.7 | 2002 | 1    | 15 | .241 |
| 42 | Siennick - NLSY79            | 2009 | 6,581  | 2 | 1 | 1 | 48.8 | 36.7 | 2002 | 1    | 16 | .052 |
| 25 | Van Dam                      | 2005 | 57     | 3 | 3 | 2 | 0.0  | 9999 | 2001 | 1    | 1  | .350 |

|    |                         |      |     |   |   |   |      |      |      |      |   |      |
|----|-------------------------|------|-----|---|---|---|------|------|------|------|---|------|
| 26 | Van Heijst and Verhagen | 2009 | 826 | 3 | 2 | 2 | 87.0 | 30.0 | 2007 | 1    | 1 | .380 |
| 27 | Wang and Xiao           | 2009 | 272 | 2 | 2 | 1 | 45.0 | 31.0 | 2007 | 1    | 2 | .440 |
| 28 | Zara and Farrington     | 2010 | 403 | 1 | 3 | 2 | 0.0  | 13.0 | 1970 | 9999 | 1 | .241 |
| 29 | Zhang and Kemp          | 2009 | 328 | 2 | 2 | 3 | 53.4 | 9999 | 2007 | 1    | 1 | .896 |

*Note.* NLSY79 = National Longitudinal Survey of Youth 1997; Add Health = National Longitudinal Study of Adolescent Health; # Items = Number of items; *N* = number of participants; *ESp* = effect size proportion *p*. 9999 = missing value; Age group: 1 = adolescents, 2 = young adults, 3 = mixed; Sample type: 1 = general sample, 2 = students, 3 = high risk youths; Continent: 1 = North America, 2 = Europe, 3 = Australia; Type of debt: 1 = general debt, 2 = credit card debt, 3 = financial problems, 11 = consumer debt, 12 = student loan, 13 = bank loan, 14 = overdraft, 15 = auto loan, 16 = personal loan.
