# Supplementary material for: A Systematic Review of Financial Debt in Adolescents and Young Adults: Prevalence, Correlates and Associations with Crime
Source: PubMed Central journal article supplement (PMC4138212; doi:10.1371/journal.pone.0104909), 2014-08-19
Supplement: pone.0104909.s003.pdf [file pone.0104909.s003.pdf]

Table S2

*Correlates of debt*

| Study ID | Author                     | Year | <i>N</i> | Type of debt | Domain | Correlate                         | <i>ESr</i> |
|----------|----------------------------|------|----------|--------------|--------|-----------------------------------|------------|
| 31       | Archuleta, Dale, and Spann | 2013 | 180      | 1            | 1      | Income                            | .070       |
| 31       | Archuleta, Dale, and Spann | 2013 | 180      | 1            | 1      | Marital status                    | .120       |
| 31       | Archuleta, Dale, and Spann | 2013 | 180      | 1            | 1      | Sex (female)                      | .150       |
| 31       | Archuleta, Dale, and Spann | 2013 | 180      | 1            | 1      | Ethnic minority                   | -.070      |
| 31       | Archuleta, Dale, and Spann | 2013 | 180      | 1            | 5      | Financial anxiety                 | .270       |
| 31       | Archuleta, Dale, and Spann | 2013 | 180      | 1            | 5      | Financial well-being (vs. stress) | -.270      |
| 31       | Archuleta, Dale, and Spann | 2013 | 180      | 1            | 5      | Financial knowledge               | .180       |
| 42       | Caputo                     | 2012 | 5,304    | 1            | 1      | Region (US south)                 | .060       |
| 42       | Caputo                     | 2012 | 5,304    | 1            | 1      | Urbanization (urban)              | .027       |
| 42       | Caputo                     | 2012 | 5,304    | 1            | 1      | Ethnic minority                   | .168       |
| 42       | Caputo                     | 2012 | 5,304    | 1            | 1      | SES                               | -.149      |
| 42       | Caputo                     | 2012 | 5,304    | 1            | 1      | Sex (female)                      | .085       |
| 42       | Caputo                     | 2012 | 5,304    | 1            | 1      | Age                               | -.066      |
| 42       | Caputo                     | 2012 | 5,304    | 1            | 2      | Locus of control (externalizing)  | .241       |
| 42       | Caputo                     | 2012 | 5,304    | 1            | 2      | Self-esteem                       | -.377      |

---

|    |                                  |      |       |   |   |                                  |       |
|----|----------------------------------|------|-------|---|---|----------------------------------|-------|
| 42 | Caputo                           | 2012 | 5,304 | 1 | 3 | Lived with parents               | -.107 |
| 42 | Caputo                           | 2012 | 5,304 | 1 | 3 | Change in parental income        | .202  |
| 32 | Crocker and Luhtanen             | 2003 | 631   | 3 | 2 | Self-esteem                      | -.080 |
| 32 | Crocker and Luhtanen             | 2003 | 631   | 3 | 2 | Narcissism                       | .060  |
| 32 | Crocker and Luhtanen             | 2003 | 631   | 3 | 2 | Extraversion                     | .020  |
| 32 | Crocker and Luhtanen             | 2003 | 631   | 3 | 2 | Agreeability                     | -.040 |
| 32 | Crocker and Luhtanen             | 2003 | 631   | 3 | 2 | Conscientiousness                | .020  |
| 32 | Crocker and Luhtanen             | 2003 | 631   | 3 | 2 | Neuroticism                      | .100  |
| 32 | Crocker and Luhtanen             | 2003 | 631   | 3 | 2 | Openness                         | .050  |
| 32 | Crocker and Luhtanen             | 2003 | 631   | 3 | 2 | School performance               | -.190 |
| 32 | Crocker and Luhtanen             | 2003 | 631   | 3 | 2 | School performance               | -.200 |
| 4  | Grable and Joo                   | 2006 | 110   | 2 | 1 | Ethnic minority                  | .231  |
| 34 | Ha                               | 2013 | 257   | 2 | 1 | Income                           | .363  |
| 34 | Ha                               | 2013 | 257   | 2 | 1 | Marital status                   | .000  |
| 34 | Ha                               | 2013 | 257   | 2 | 1 | Study year                       | .000  |
| 34 | Ha                               | 2013 | 257   | 2 | 1 | Age                              | .000  |
| 5  | Haultain, Kemp, and Chernyshenko | 2010 | 125   | 1 | 2 | Attitude towards deb (pro-debt)  | .140  |
| 5  | Haultain, Kemp, and Chernyshenko | 2010 | 125   | 1 | 2 | Attitude towards debt (pro-debt) | -.010 |
| 6  | Jessop, Herberts, and Solomon    | 2005 | 187   | 1 | 1 | Age                              | -.040 |

---

---

|    |                                  |      |     |   |   |                                            |       |
|----|----------------------------------|------|-----|---|---|--------------------------------------------|-------|
| 6  | Jessop, Herberts, and Solomon    | 2005 | 187 | 1 | 1 | Hours worked                               | .090  |
| 6  | Jessop, Herberts, and Solomon    | 2005 | 187 | 1 | 2 | Physical health                            | -.280 |
| 6  | Jessop, Herberts, and Solomon    | 2005 | 187 | 1 | 2 | Physical health                            | -.340 |
| 6  | Jessop, Herberts, and Solomon    | 2005 | 187 | 1 | 2 | locus of control (external)                | -.060 |
| 6  | Jessop, Herberts, and Solomon    | 2005 | 187 | 1 | 2 | Physical health                            | -.160 |
| 6  | Jessop, Herberts, and Solomon    | 2005 | 187 | 1 | 2 | Physical health                            | -.070 |
| 6  | Jessop, Herberts, and Solomon    | 2005 | 187 | 1 | 2 | Mental health                              | -.130 |
| 6  | Jessop, Herberts, and Solomon    | 2005 | 187 | 1 | 2 | Social functioning                         | -.280 |
| 6  | Jessop, Herberts, and Solomon    | 2005 | 187 | 1 | 2 | Mental health                              | -.160 |
| 6  | Jessop, Herberts, and Solomon    | 2005 | 187 | 1 | 2 | Physical health                            | -.170 |
| 6  | Jessop, Herberts, and Solomon    | 2005 | 187 | 1 | 2 | Physical health                            | .170  |
| 6  | Jessop, Herberts, and Solomon    | 2005 | 187 | 1 | 2 | Physical health                            | -.260 |
| 6  | Jessop, Herberts, and Solomon    | 2005 | 187 | 1 | 2 | Physical health                            | -.060 |
| 6  | Jessop, Herberts, and Solomon    | 2005 | 187 | 1 | 5 | Financial wellbeing (vs. stress)           | -.380 |
| 8  | Joireman, Kees, and Sprott       | 2010 | 209 | 2 | 2 | Take into account consequences of behavior | -.170 |
| 8  | Joireman, Kees, and Sprott       | 2010 | 209 | 2 | 5 | Compulsive buying                          | .510  |
| 12 | Morra, Regehr, and Ginsburg      | 2008 | 549 | 1 | 1 | Study year                                 | .131  |
| 12 | Morra, Regehr, and Ginsburg      | 2008 | 549 | 1 | 5 | Financial wellbeing (vs. stress)           | -.300 |
| 13 | Nelissen, Van de Ven, and Stapel | 2011 | 918 | 1 | 1 | Income                                     | .280  |

---

---

|    |                                                       |      |     |   |   |                                   |       |
|----|-------------------------------------------------------|------|-----|---|---|-----------------------------------|-------|
| 13 | Nelissen, Van de Ven, and Stapel                      | 2011 | 918 | 1 | 1 | Age                               | .270  |
| 13 | Nelissen, Van de Ven, and Stapel                      | 2011 | 918 | 1 | 1 | Sex (female)                      | .190  |
| 13 | Nelissen, Van de Ven, and Stapel                      | 2011 | 918 | 1 | 2 | Self-esteem                       | -.040 |
| 13 | Nelissen, Van de Ven, and Stapel                      | 2011 | 918 | 1 | 4 | Status concern                    | .070  |
| 13 | Nelissen, Van de Ven, and Stapel                      | 2011 | 918 | 1 | 4 | Status concern                    | .060  |
| 13 | Nelissen, Van de Ven, and Stapel                      | 2011 | 918 | 1 | 4 | Status concern                    | .110  |
| 13 | Nelissen, Van de Ven, and Stapel                      | 2011 | 918 | 1 | 4 | Social comparison tendency        | -.010 |
| 13 | Nelissen, Van de Ven, and Stapel                      | 2011 | 918 | 1 | 5 | Attitude towards debt (pro-debt)  | .120  |
| 13 | Nelissen, Van de Ven, and Stapel                      | 2011 | 918 | 1 | 5 | Attitude towards debt (pro-debt)  | .160  |
| 16 | Norvilitis and MacLean                                | 2010 | 173 | 2 | 2 | Delay of gratification            | -.100 |
| 16 | Norvilitis and MacLean                                | 2010 | 173 | 2 | 3 | Parental financial support        | -.080 |
| 16 | Norvilitis and MacLean                                | 2010 | 173 | 2 | 3 | Parental financial support        | -.250 |
| 16 | Norvilitis and MacLean                                | 2010 | 173 | 2 | 3 | Parent worries                    | .040  |
| 16 | Norvilitis and MacLean                                | 2010 | 173 | 2 | 3 | Parent talking about finances     | -.020 |
| 16 | Norvilitis and MacLean                                | 2010 | 173 | 2 | 3 | Parent bailout                    | -.290 |
| 16 | Norvilitis and MacLean                                | 2010 | 173 | 2 | 5 | Financial knowledge               | .200  |
| 16 | Norvilitis and MacLean                                | 2010 | 173 | 2 | 5 | Financial wellbeing (vs. stress)  | -.550 |
| 15 | Norvilitis, Merwin, Osberg, Roehling, Young and Kamas | 2011 | 398 | 2 | 1 | Sex (female)                      | .049  |
| 15 | Norvilitis, Merwin, Osberg, Roehling, Young and Kamas | 2011 | 399 | 2 | 1 | State school (vs. private school) | .155  |

---

---

|    |                              |      |       |   |   |                                                             |       |
|----|------------------------------|------|-------|---|---|-------------------------------------------------------------|-------|
| 18 | Oosterbeek and Van den Broek | 2009 | 5,621 | 1 | 1 | Sex (female)                                                | -.088 |
| 18 | Oosterbeek and Van den Broek | 2009 | 4,840 | 1 | 1 | Age                                                         | .294  |
| 18 | Oosterbeek and Van den Broek | 2009 | 5,621 | 1 | 1 | Holds part-time job                                         | -.024 |
| 18 | Oosterbeek and Van den Broek | 2009 | 5,621 | 1 | 1 | Hours worked                                                | .023  |
| 18 | Oosterbeek and Van den Broek | 2009 | 5,621 | 1 | 1 | Study hours                                                 | .030  |
| 18 | Oosterbeek and Van den Broek | 2009 | 5,621 | 1 | 1 | Earnings after graduation                                   | .000  |
| 18 | Oosterbeek and Van den Broek | 2009 | 5,621 | 1 | 1 | Earnings after graduation                                   | .009  |
| 18 | Oosterbeek and Van den Broek | 2009 | 5,621 | 1 | 1 | Risk attitude                                               | .114  |
| 18 | Oosterbeek and Van den Broek | 2009 | 2,623 | 1 | 2 | School performance                                          | -.007 |
| 18 | Oosterbeek and Van den Broek | 2009 | 4,784 | 1 | 2 | School performance                                          | -.005 |
| 18 | Oosterbeek and Van den Broek | 2009 | 5,621 | 1 | 2 | School performance                                          | -.131 |
| 18 | Oosterbeek and Van den Broek | 2009 | 5,621 | 1 | 2 | School performance                                          | -.064 |
| 18 | Oosterbeek and Van den Broek | 2009 | 5,621 | 1 | 2 | probability to find suitable job                            | -.023 |
| 18 | Oosterbeek and Van den Broek | 2009 | 4,840 | 1 | 3 | Parental income                                             | -.076 |
| 18 | Oosterbeek and Van den Broek | 2009 | 4,764 | 1 | 3 | Parents attitude to debt                                    | .391  |
| 18 | Oosterbeek and Van den Broek | 2009 | 5,621 | 1 | 5 | Discount rate (valuation of current vs. future consumption) | -.170 |
| 18 | Oosterbeek and Van den Broek | 2009 | 5,621 | 1 | 5 | Attitude to debt (pro-debt)                                 | .386  |
| 21 | Ross, Cleland and MacLeod    | 2006 | 332   | 1 | 1 | Sex (female)                                                | .000  |

---

---

|    |                              |      |     |   |   |                                                                                     |       |
|----|------------------------------|------|-----|---|---|-------------------------------------------------------------------------------------|-------|
| 21 | Ross, Cleland and MacLeod    | 2006 | 334 | 1 | 1 | Study year                                                                          | .438  |
| 21 | Ross, Cleland and MacLeod    | 2006 | 334 | 1 | 1 | SES                                                                                 | -.173 |
| 21 | Ross, Cleland and MacLeod    | 2006 | 334 | 1 | 1 | Hours worked                                                                        | .000  |
| 21 | Ross, Cleland and MacLeod    | 2006 | 334 | 1 | 2 | School performance                                                                  | .000  |
| 21 | Ross, Cleland and MacLeod    | 2006 | 334 | 1 | 2 | Mental health                                                                       | -.096 |
| 21 | Ross, Cleland and MacLeod    | 2006 | 334 | 1 | 5 | Financial wellbeing (vs. stress)                                                    | -.127 |
| 24 | Shim, Xiao, Barber, and Lyon | 2009 | 781 | 1 | 1 | Financial education                                                                 | .030  |
| 24 | Shim, Xiao, Barber, and Lyon | 2009 | 781 | 1 | 1 | Sex (female)                                                                        | .040  |
| 24 | Shim, Xiao, Barber, and Lyon | 2009 | 781 | 1 | 1 | Study year                                                                          | .290  |
| 24 | Shim, Xiao, Barber, and Lyon | 2009 | 781 | 1 | 1 | Income                                                                              | .270  |
| 24 | Shim, Xiao, Barber, and Lyon | 2009 | 781 | 1 | 2 | Self-esteem                                                                         | .110  |
| 24 | Shim, Xiao, Barber, and Lyon | 2009 | 781 | 1 | 3 | Parents talking about finances                                                      | -.110 |
| 24 | Shim, Xiao, Barber, and Lyon | 2009 | 781 | 1 | 3 | Parental income                                                                     | -.140 |
| 24 | Shim, Xiao, Barber, and Lyon | 2009 | 781 | 1 | 3 | Willingness to meet parental expectations<br>(towards positive financial behaviors) | .010  |
| 24 | Shim, Xiao, Barber, and Lyon | 2009 | 781 | 1 | 5 | Perceived control toward financial management                                       | .370  |
| 24 | Shim, Xiao, Barber, and Lyon | 2009 | 781 | 1 | 5 | Financial knowledge                                                                 | .050  |
| 24 | Shim, Xiao, Barber, and Lyon | 2009 | 781 | 1 | 5 | Attitudes towards financial management                                              | -.010 |
| 24 | Shim, Xiao, Barber, and Lyon | 2009 | 781 | 1 | 5 | Financial management intention                                                      | -.180 |

---

|    |                              |      |     |   |   |                                              |       |
|----|------------------------------|------|-----|---|---|----------------------------------------------|-------|
| 24 | Shim, Xiao, Barber, and Lyon | 2009 | 781 | 1 | 5 | Financial wellbeing (vs. stress)             | .320  |
| 27 | Wang and Xiao                | 2009 | 272 | 2 | 2 | Seek social support                          | -.000 |
| 27 | Wang and Xiao                | 2009 | 272 | 2 | 3 | Parental income                              | -.000 |
| 27 | Wang and Xiao                | 2009 | 272 | 2 | 5 | Compulsive buying                            | .100  |
| 27 | Wang and Xiao                | 2009 | 272 | 2 | 5 | Compulsive buying                            | .100  |
| 27 | Wang and Xiao                | 2009 | 272 | 2 | 5 | Budget constraint                            | .100  |
| 29 | Zhang and Kemp               | 2009 | 328 | 1 | 1 | Sex (female)                                 | .100  |
| 29 | Zhang and Kemp               | 2009 | 328 | 1 | 1 | Study year                                   | .490  |
| 29 | Zhang and Kemp               | 2009 | 328 | 1 | 2 | Motivation towards study (intrinsic)         | .150  |
| 29 | Zhang and Kemp               | 2009 | 328 | 1 | 2 | motivation towards study (intrinsic)         | .160  |
| 29 | Zhang and Kemp               | 2009 | 328 | 1 | 2 | Study performance                            | -.060 |
| 29 | Zhang and Kemp               | 2009 | 328 | 1 | 2 | Study performance                            | .050  |
| 29 | Zhang and Kemp               | 2009 | 328 | 1 | 2 | Happiness                                    | -.010 |
| 29 | Zhang and Kemp               | 2009 | 328 | 1 | 5 | Attitude towards debt (pro-debt)             | .210  |
| 29 | Zhang and Kemp               | 2009 | 328 | 1 | 5 | Rated extent to which debt affects happiness | -.020 |

*Note.* Type of debt: 1 = general debt, 2 = credit card debt, 3 = financial problems; Domain: 1 = demographics; 2 = individual, 3 = family, 4 = peer, 5 = financial; *N* = number of participants; *ESr* = effect size correlation *r*.
